# Supplementary material for: Functional requirements for a Samd14-capping protein complex in stress erythropoiesis
Source: eLife. 2022 Jun 17;11:e76497. doi: 10.7554/eLife.76497 (PMC9282853; doi:10.7554/eLife.76497)
Supplement: Supplementary file 1. — Mass spectrometry analysis of IP protein in EV and Samd14 conditions (N=3). Spectral count of each protein, as determined by Scaffold. Statistical significance between EV and HA-Samd14 conditions determined by Scaffold. [file elife-76497-supp1.xlsx]

## Sheet: Sheet1
My Experiment, Samples report created on 02/15/2019	Visible?	Identified Proteins (1926/1982)	Accession Number	Alternate ID	Molecular Weight	ANOVA Test (p-value): *(p < 0.00003)	EV	Samd14	deltaSAM		Fold-change
3	TRUE	Sterile alpha motif domain-containing protein 14 OS=Mus musculus OX=10090 GN=Samd14 PE=1 SV=1	SAM14_MOUSE		45 kDa	0.0051	6.75	167.667	304.5		24.8395
6.1	TRUE	Capping protein (Actin filament) muscle Z-line, beta, isoform CRA_a OS=Mus musculus OX=10090 GN=Capzb PE=1 SV=1	A2AMW0_MOUSE		29 kDa	0.0075	0.5	11	23.5		22
45	TRUE	F-actin-capping protein subunit alpha-1 OS=Mus musculus OX=10090 GN=Capza1 PE=1 SV=4	CAZA1_MOUSE		33 kDa	0.0091	1.5	22	52.5		14.6667
19	TRUE	F-actin-capping protein subunit alpha-2 OS=Mus musculus OX=10090 GN=Capza2 PE=1 SV=3	CAZA2_MOUSE		33 kDa	0.0037	2.75	29	65		10.5455
435.1	TRUE	Transgelin-2 OS=Mus musculus OX=10090 GN=Tagln2 PE=1 SV=4	TAGL2_MOUSE		22 kDa	0.019	2.25	15.3333	3.25		6.81481
248.1	TRUE	Eukaryotic initiation factor 4A-I OS=Mus musculus OX=10090 GN=Eif4a1 PE=1 SV=1	IF4A1_MOUSE		46 kDa	0.0093	3	16.3333	6.5		5.44444
162	TRUE	Lupus La protein homolog OS=Mus musculus OX=10090 GN=Ssb PE=1 SV=1	LA_MOUSE		48 kDa	0.0011	2.5	11.3333	5		4.53333
178.1	TRUE	14-3-3 protein zeta/delta OS=Mus musculus OX=10090 GN=Ywhaz PE=1 SV=1	1433Z_MOUSE		28 kDa	0.049	3.5	14.3333	7.25		4.09524
277	TRUE	DNA replication licensing factor MCM7 OS=Mus musculus OX=10090 GN=Mcm7 PE=1 SV=1	MCM7_MOUSE		81 kDa	0.016	3.5	13.6667	8		3.90476
127.1	TRUE	Fructose-bisphosphate aldolase A OS=Mus musculus OX=10090 GN=Aldoa PE=1 SV=2	ALDOA_MOUSE		39 kDa	0.035	10.25	39.6667	16.25		3.86992
195	TRUE	ATP-citrate synthase OS=Mus musculus OX=10090 GN=Acly PE=1 SV=1	ACLY_MOUSE (+1)		120 kDa	0.03	3.75	14.3333	5.75		3.82222
249	TRUE	Transaldolase OS=Mus musculus OX=10090 GN=Taldo1 PE=1 SV=1	A0A1B0GR11_MOUSE (+1)		42 kDa	0.011	4.5	15.6667	6.75		3.48148
311	TRUE	60S ribosomal protein L5 OS=Mus musculus OX=10090 GN=Rpl5 PE=1 SV=3	RL5_MOUSE		34 kDa	0.024	4.5	15.3333	6		3.40741
196	TRUE	Bifunctional purine biosynthesis protein PURH OS=Mus musculus OX=10090 GN=Atic PE=1 SV=2	PUR9_MOUSE		64 kDa	0.032	7.25	23.6667	9.5		3.26437
310	TRUE	Asparagine synthetase [glutamine-hydrolyzing] OS=Mus musculus OX=10090 GN=Asns PE=1 SV=3	ASNS_MOUSE		64 kDa	0.022	6	18.6667	5		3.11111
278.1	TRUE	Cofilin-1 OS=Mus musculus OX=10090 GN=Cfl1 PE=1 SV=3	COF1_MOUSE		19 kDa	0.038	3.75	11.6667	4.75		3.11111
177.1	TRUE	Heterogeneous nuclear ribonucleoprotein K OS=Mus musculus OX=10090 GN=Hnrnpk PE=1 SV=1	B2M1R6_MOUSE		49 kDa	0.01	6.5	18.6667	9		2.87179
305	TRUE	Actin-related protein 3 OS=Mus musculus OX=10090 GN=Actr3 PE=1 SV=3	ARP3_MOUSE		47 kDa	0.0044	4	11.3333	2.75		2.83333
103	TRUE	Heat shock protein HSP 90-beta OS=Mus musculus OX=10090 GN=Hsp90ab1 PE=1 SV=3	HS90B_MOUSE		83 kDa	0.037	15	42.3333	20		2.82222
251	TRUE	Protein disulfide-isomerase A6 OS=Mus musculus OX=10090 GN=Pdia6 PE=1 SV=3	PDIA6_MOUSE		48 kDa	0.029	5	12	7.5		2.4
172	TRUE	40S ribosomal protein S5 OS=Mus musculus OX=10090 GN=Rps5 PE=1 SV=1	Q91V55_MOUSE		23 kDa	0.012	6	12.6667	7.25		2.11111
