# Supplementary figures and images for: Functional requirements for a Samd14-capping protein complex in stress erythropoiesis
Source: eLife journal article supplement (doi:10.7554/elife.76497), 2022-06-17

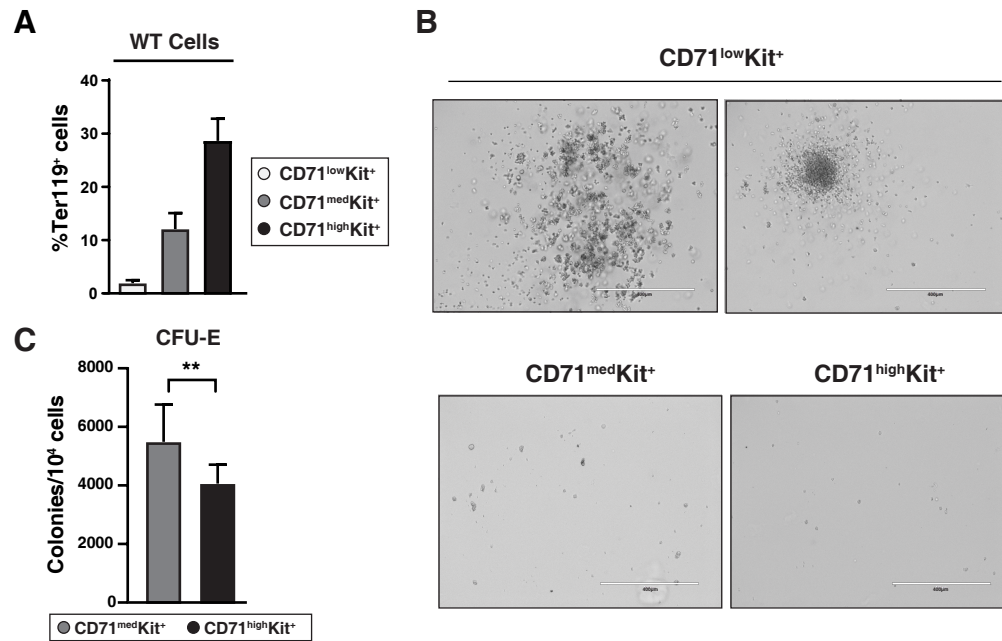

Supplement: supp [file elife-76497-supp-v1.zip]

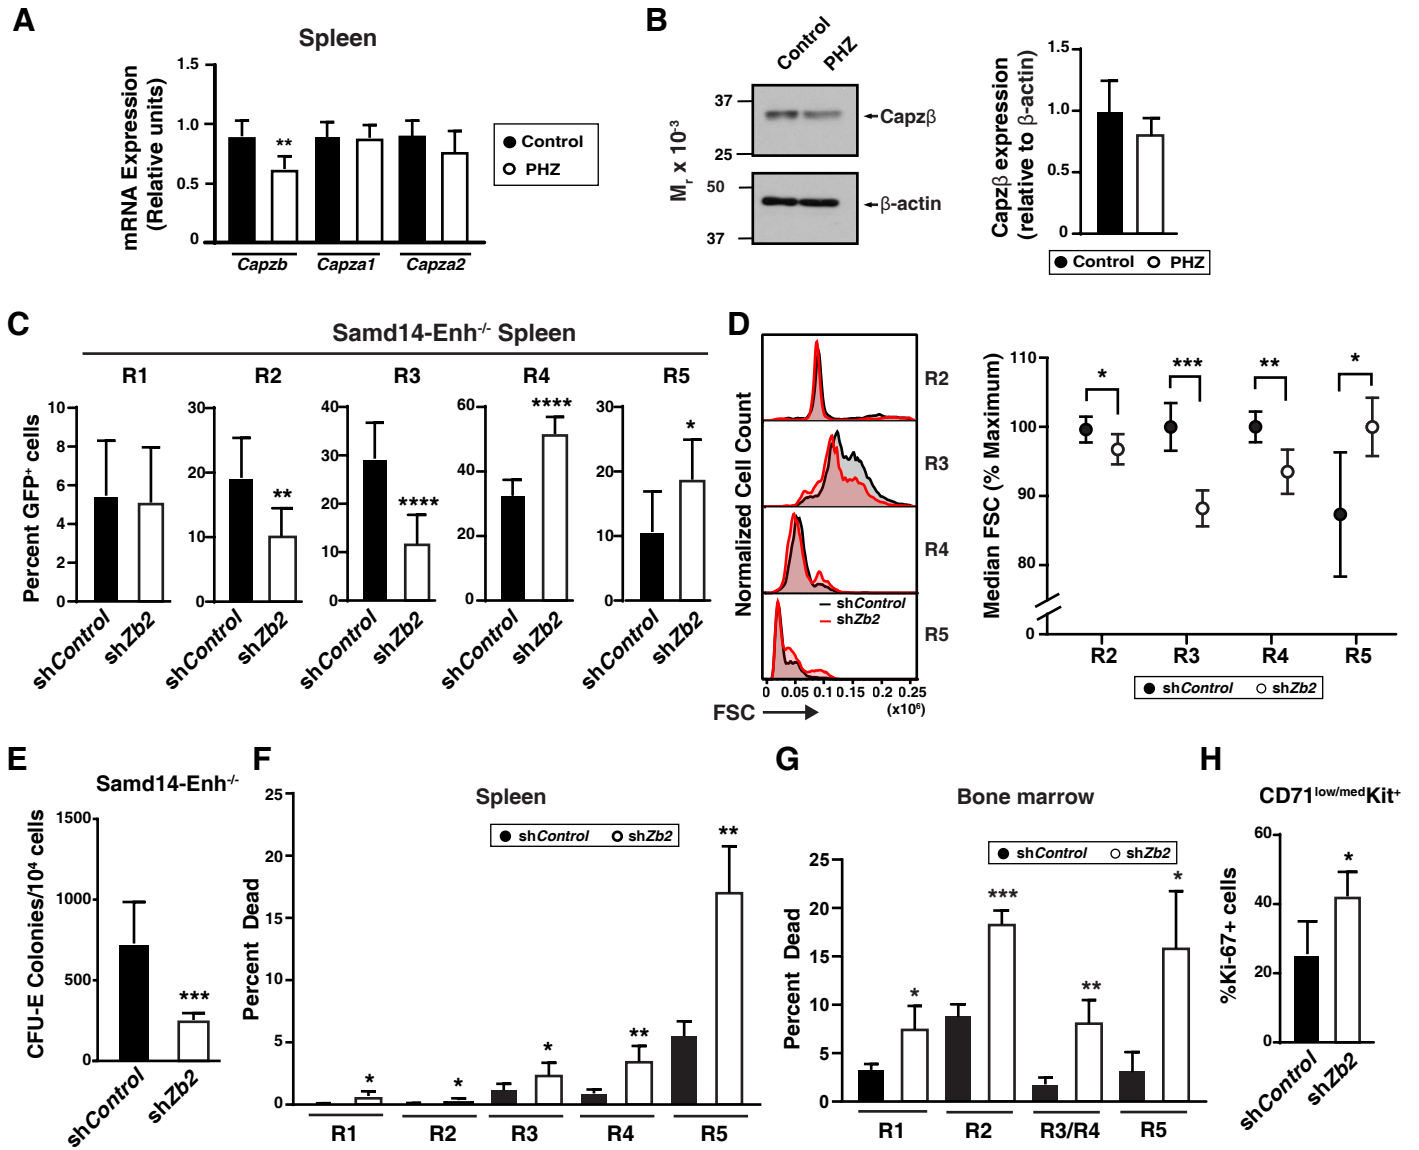

Supplement: supp [file elife-76497-supp-v1.zip]

**A**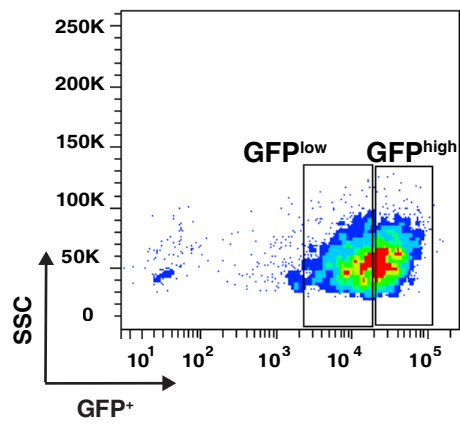**B**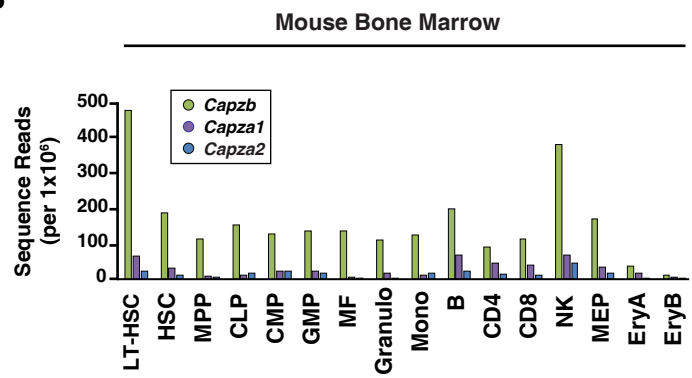

Supplement: supp [file elife-76497-supp-v1.zip]

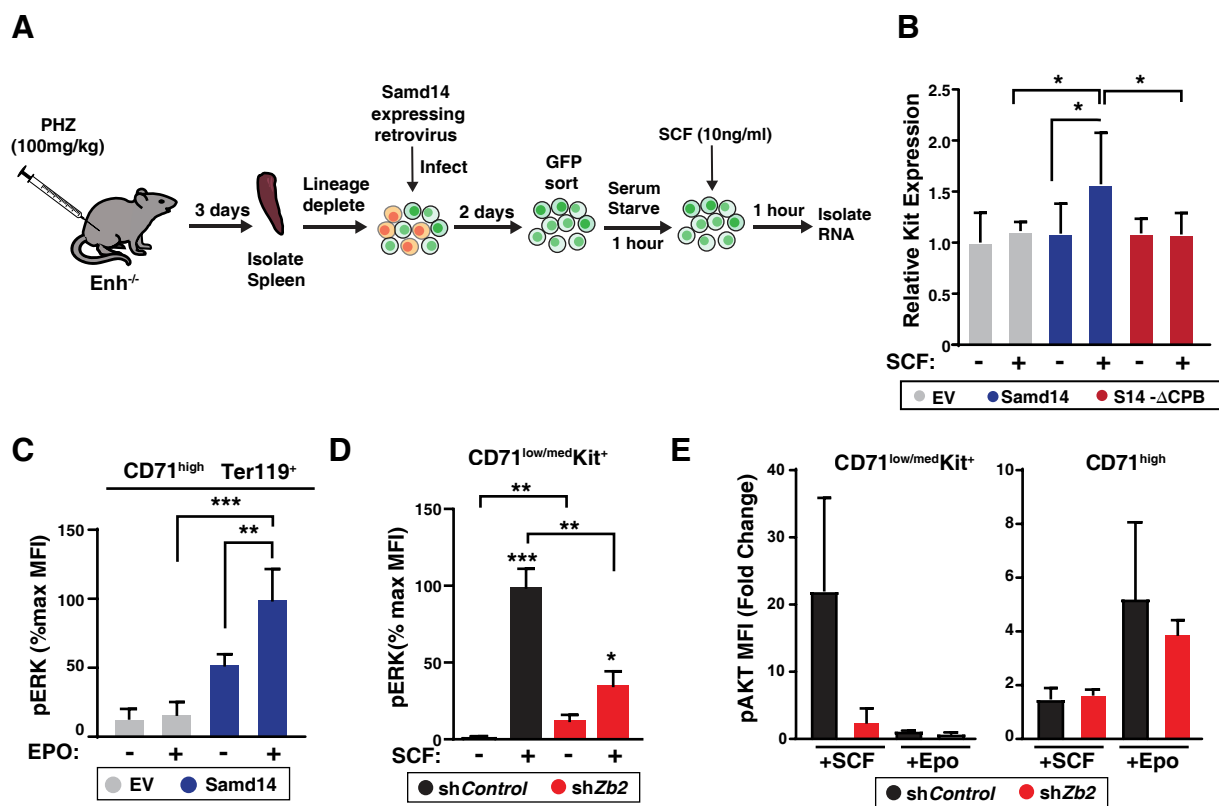

Supplement: supp [file elife-76497-supp-v1.zip]

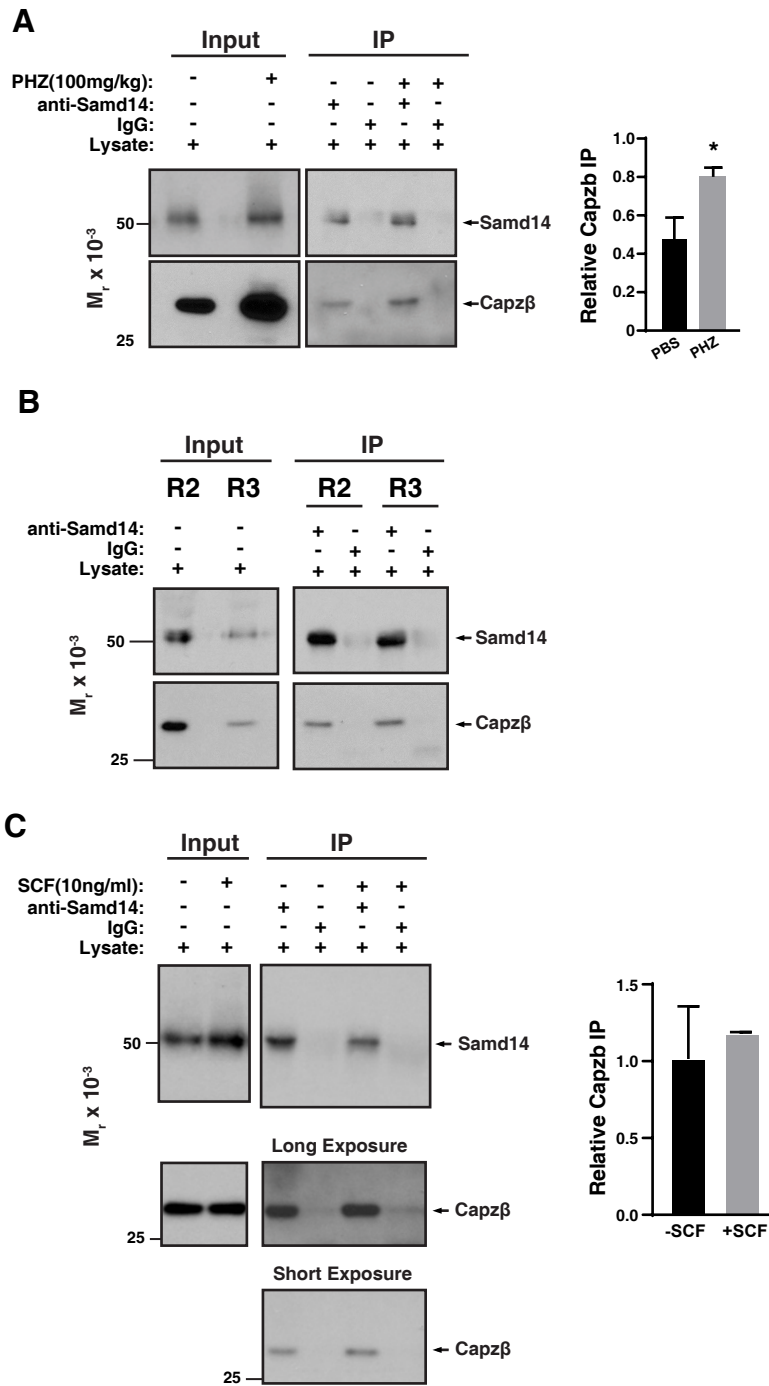

Supplement: supp [file elife-76497-supp-v1.zip]
